# Supplementary material for: Visualization of currents in neural models with similar behavior and different conductance densities
Source: eLife journal article supplement (doi:10.7554/elife.42722), 2019-01-31
Supplement: supp [file elife-42722-supp-v1.zip]

Archive with 3 entries (3 files):
- elife_poa_e42722_Figure_14_figure_supplement_1.pdf
- elife_poa_e42722_Figure_3_figure_supplement_1.pdf
- elife_poa_e42722_Transparent_Reporting_File.pdf
