# Supplementary figures and images for: Visualization of currents in neural models with similar behavior and different conductance densities
Source: eLife journal article supplement (doi:10.7554/elife.42722), 2019-01-31

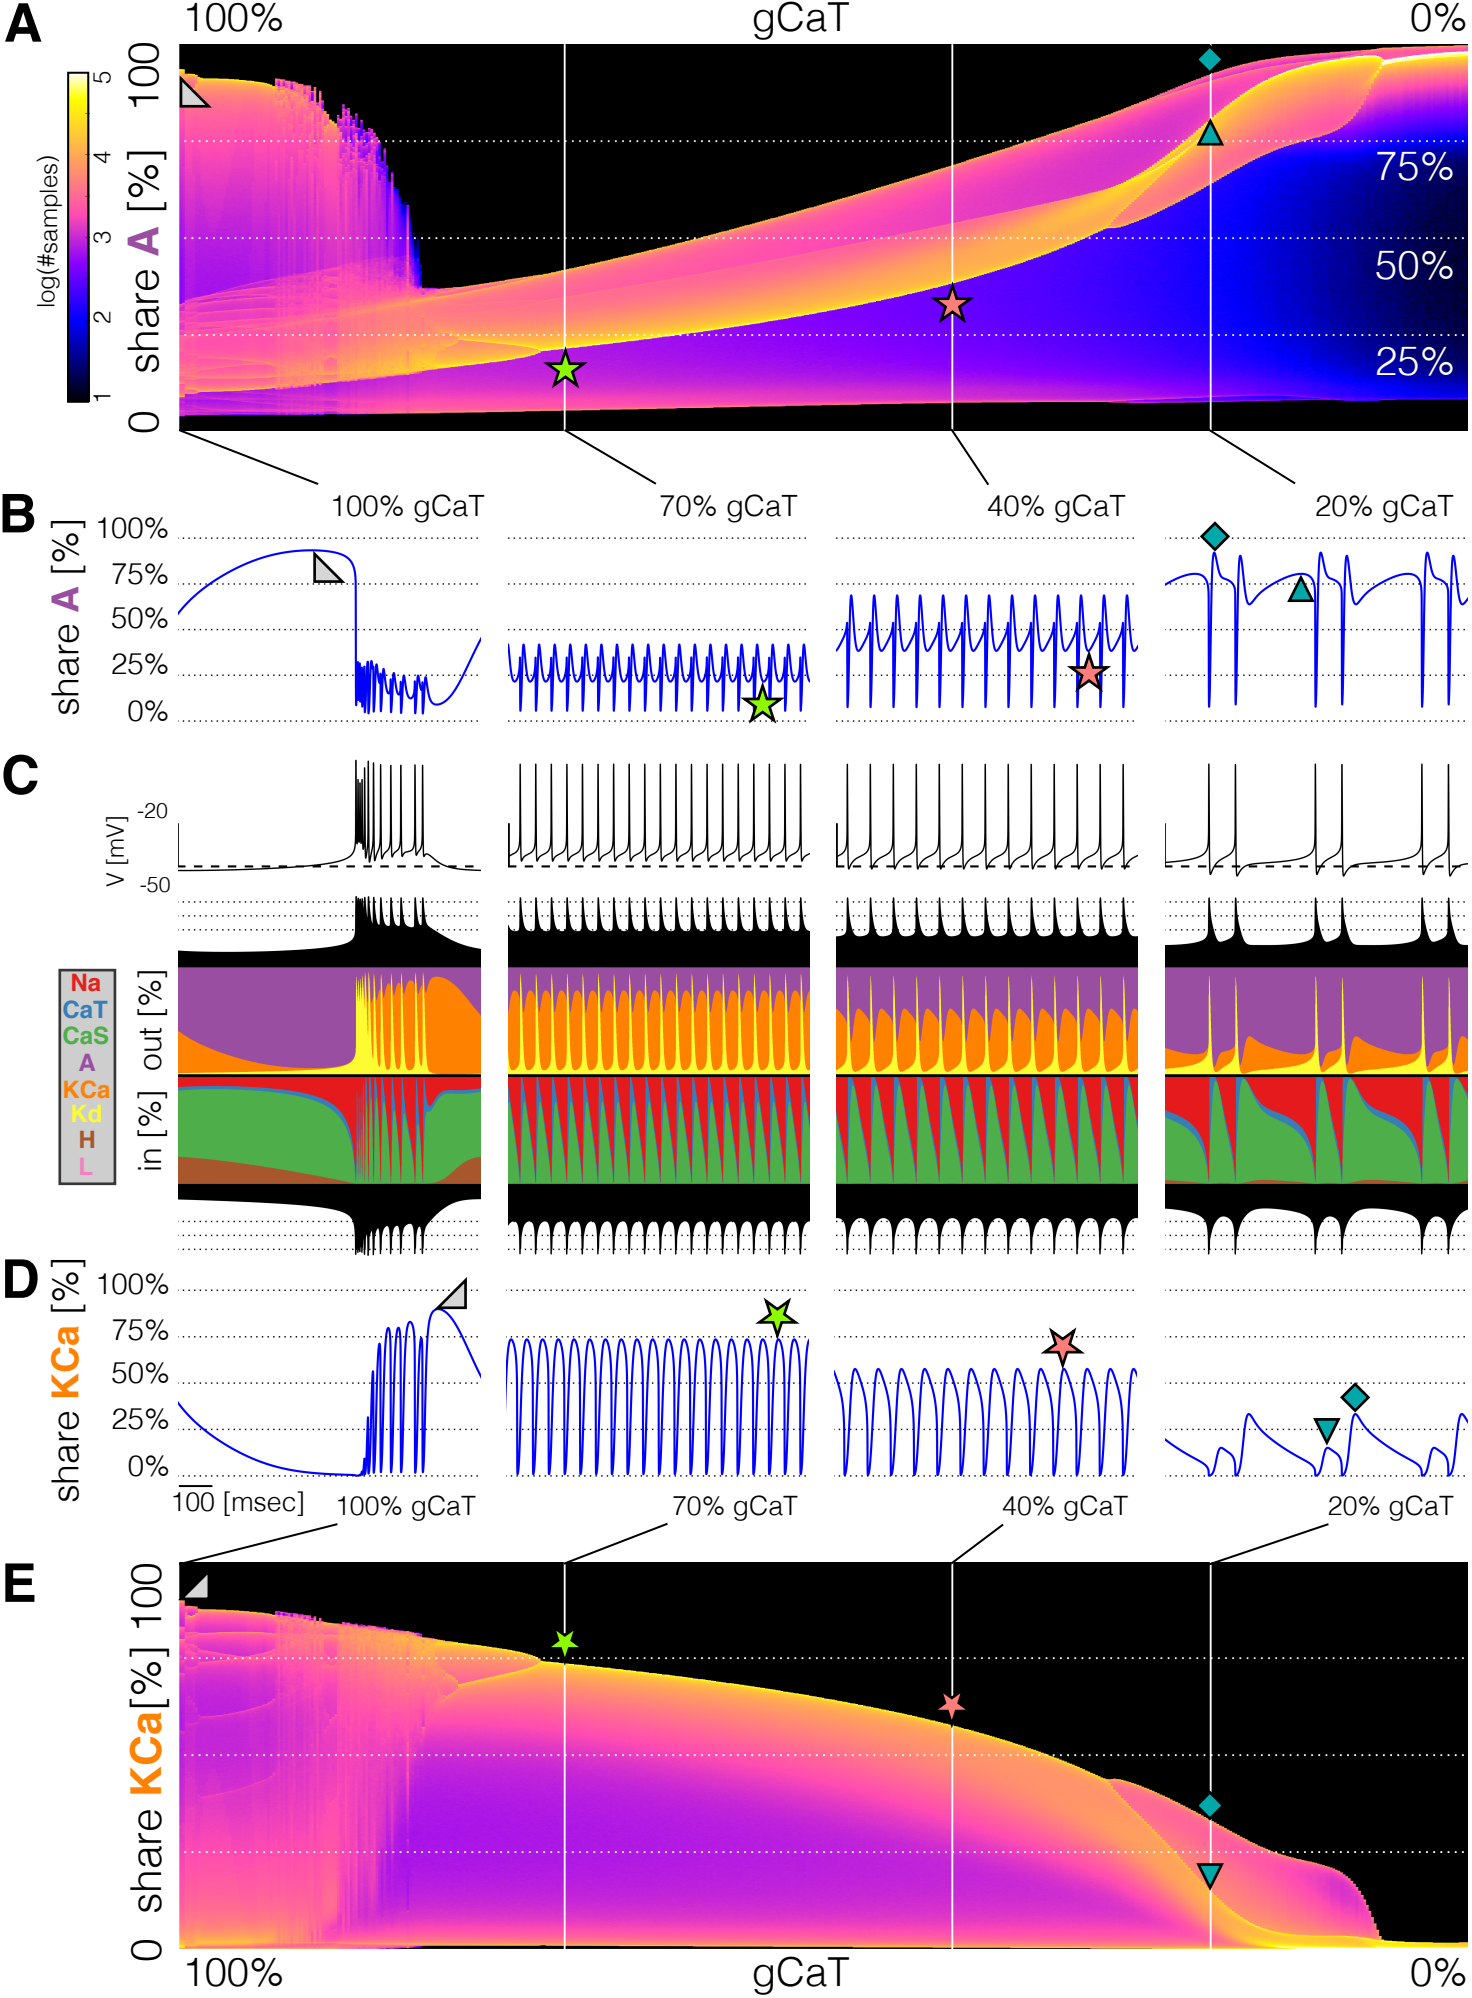

Supplement: supp [file elife-42722-supp-v1.zip › elife_poa_e42722_Figure_14_figure_supplement_1.pdf]

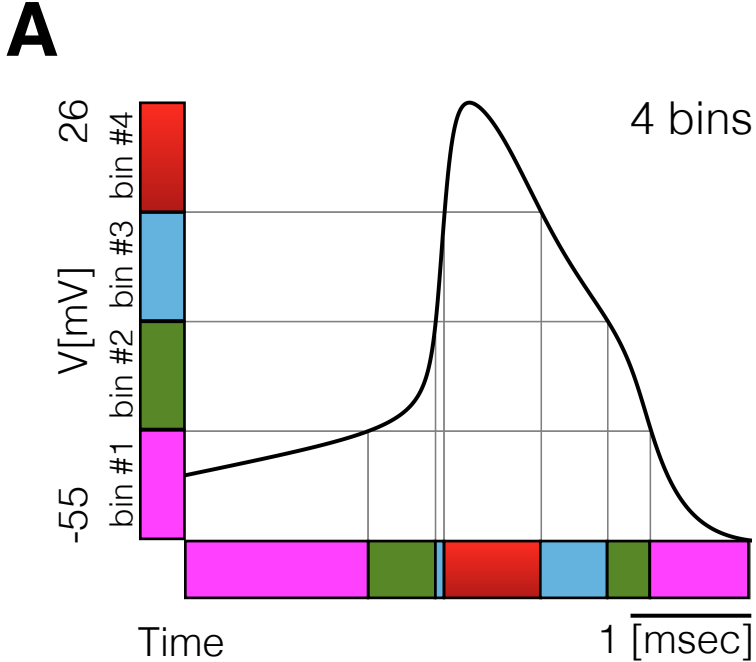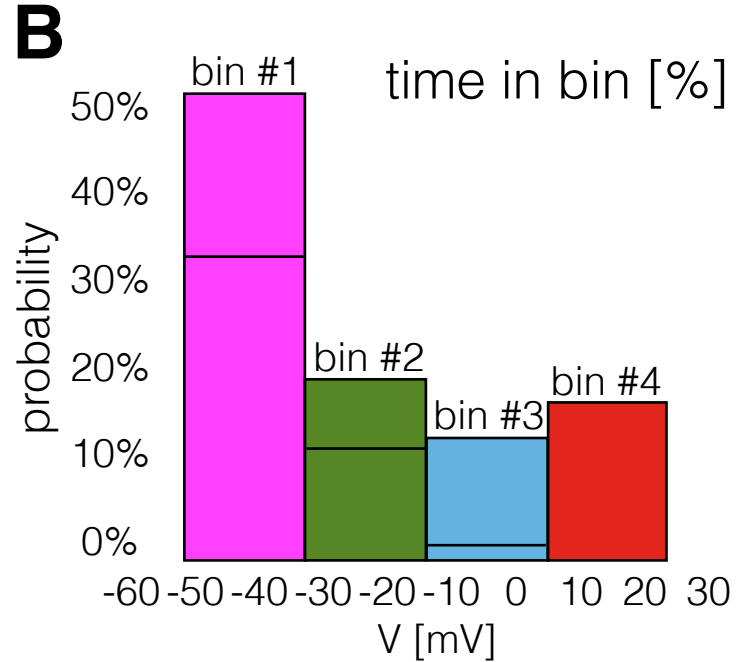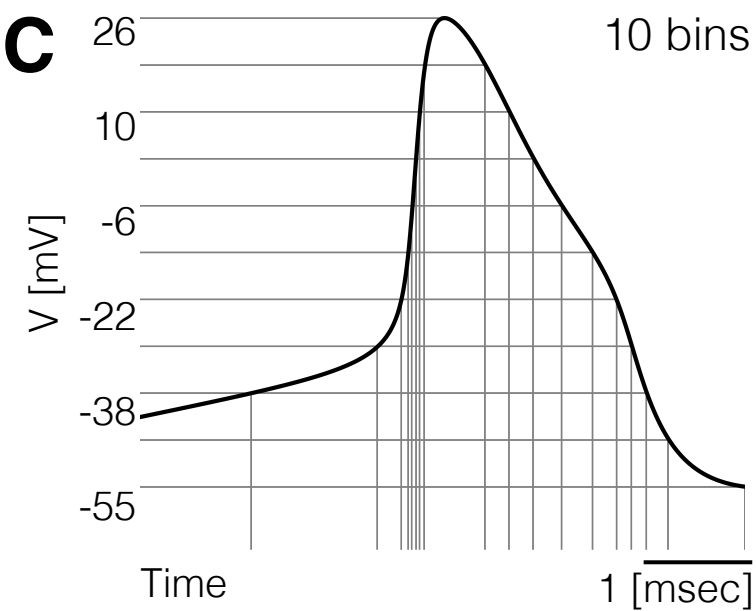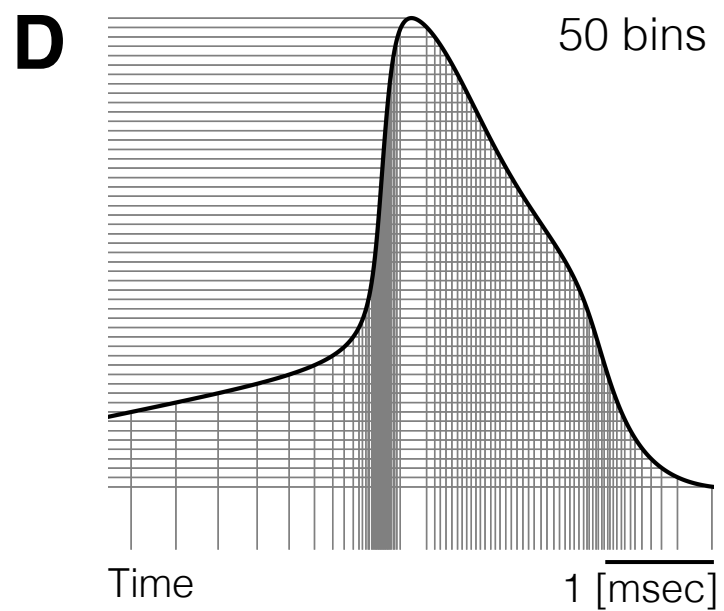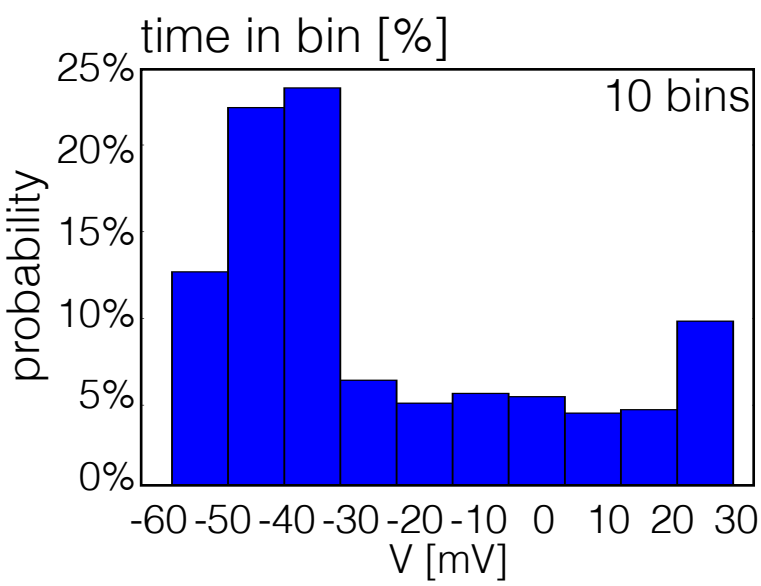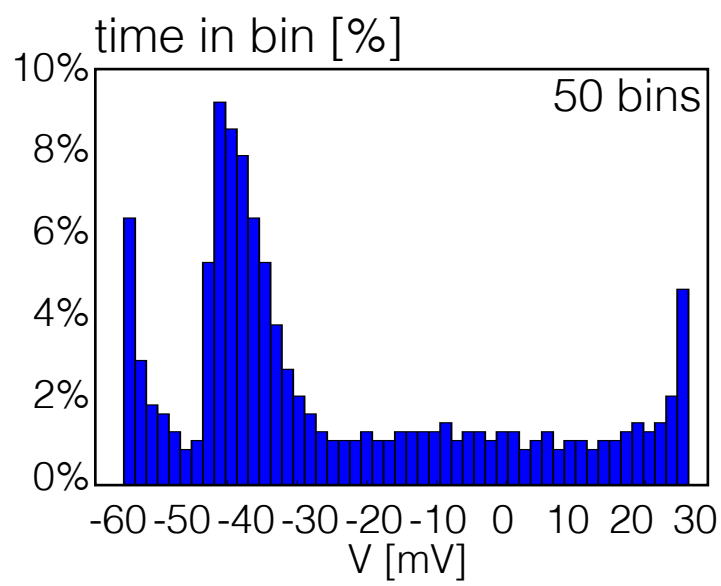

Supplement: supp [file elife-42722-supp-v1.zip › elife_poa_e42722_Figure_3_figure_supplement_1.pdf]
